# Supplementary material for: The Contribution of Stress and Distress to Cardiovascular Health in Adult Survivors of Childhood Cancer
Source: Oxford University Press journal article supplement (doi:10.1158/1055-9965.epi-20-1183), 2020-11-24
Supplement: 10559965epi201183-sup-248929_2_supp_6730615_qjyj2v.docx [file 10559965epi201183-sup-248929_2_supp_6730615_qjyj2v.docx]

Supplementary Table 4. Comparison of Study Characteristics of SJLIFE Survivors with Baseline Data Only (n=1,519) and SJLIFE Survivors with Longitudinal Data (n=1,748)

| **Variable** | **Category** | **Baseline Data Only**  **(*n*=1,519)** | **Baseline and Follow-up Data**  **(*n*=1,748)** |  |
| --- | --- | --- | --- | --- |
| ***N (%)*** | ***N (%)*** | ***P-value*** |
| **Age at Evaluation, Years** | Mean± SD | 29.3±8.5 | 32.5±8.0 | <0.0001 |
| Median (IQR) | 27.4 (22.5, 34.0) | 31.7(26.1,37.9) |
| Median (Range) | 27.4 (18.0, 64.5) | 31.7(18.3,60.6) |
| **Sex** | Female | 710 (46.7) | 876 (50.1) | 0.0543 |
| Male | 809 (53.3) | 872 (49.9) |
| **Race/Ethnicity** | Non-Hispanic White | 1222 (80.4) | 1442 (82.5) | 0.0053 |
| Non-Hispanic Black | 218 (14.4) | 254 (14.5) |
| Other | 79 (5.2) | 52 (3.0) |
| **Marital Status** | Single/Widowed/Divorced | 881 (59.5) | 847 (49.8) | <.0001 |
| Married/Living as married | 599 (40.5) | 855 (50.2) |
| **Household Income** | =<$19,999 | 260 (21.0) | 280 (18.4) | 0.1675 |
| $20,000-$59,999 | 510 (41.1) | 668 (44.0) |
| >=$60,000 | 471 (38.0) | 570 (37.5) |
| **Age at Diagnosis, Years** | Mean± SD | 8.5±5.6 | 8.5±5.6 | 0.8478 |
| Median (IQR) | 7.8 (3.4, 13.4) | 7.5 (3.4, 13.5) |
| Median (Range) | 7.8 (0.0, 24.8) | 7.5 (0.0, 23.6) |
| **Anthracyclines in Doxorubicin Equivalents**  **(mg/m2)** | 0 | 640 (42.3) | 739 (42.3) | 0.0011 |
| >0-100 | 326 (21.5) | 347 (19.9) |
| >100-200 | 269 (17.8) | 334 (19.1) |
| >200-300 | 149 (9.8) | 123 (7.0) |
| >300-400 | 106 (7.0) | 147 (8.4) |
| >400 | 24 (1.6) | 56 (3.2) |
| **Chest Radiation** | None | 1219 (80.7) | 1161 (66.5) | <.0001 |
| <20Gy | 145 (9.6) | 242 (13.9) |
| >=20Gy | 146 (9.7) | 344 (19.7) |
| **Cardiovascular Risk Factors** |  |  |  |  |
| **Hypertension** | Grade 0-1 | 1225 (81.0) | 1320 (75.5) | 0.0002 |
| Grade 2-4 | 288 (19.0) | 428 (24.5) |
| **Dyslipidemia** | Grade 0-1 | 1301 (87.7) | 1522 (87.1) | 0.6046 |
| Grade 2-4 | 182 (12.3) | 225 (12.9) |
| **Diabetes** | Grade 0-1 | 1416 (93.8) | 1596 (91.3) | 0.0078 |
| Grade 2-4 | 94 (6.2) | 152 (8.7) |
| **Metabolic Syndrome** | No | 1125 (75.5) | 1273 (73.1) | 0.1306 |
| Yes | 366 (24.5) | 468 (26.9) |
| **Lifestyle Behaviors** |  |  |  |  |
| **Smoking** | Ever smoke | 165 (11.0) | 187 (10.8) | 0.2154 |
| Now smoke | 352 (23.5) | 363 (21.0) |
| Never smoke | 980 (65.5) | 1175 (68.1) |
| **Physical activity** | Physical inactivity (<150) | 694 (46.7) | 831 (48.5) | 0.2912 |
| Physical activity (>=150) | 793 (53.3) | 881 (51.5) |
| **Risky or Heavy drinking** | No | 908 (61.9) | 1058 (62.6) | 0.6821 |
| Yes | 559 (38.1) | 632 (37.4) |
| **BMI** | Underweight (<18.5) | 59 (3.9) | 60 (3.5) | 0.7445 |
| Normal (18.5 - 24.9) | 513 (34.3) | 567 (33.0) |
| Overweight (25 – 29.9) | 419 (28.0) | 493 (28.7) |
| Obesity (>=30) | 503 (33.7) | 596 (34.7) |
| **Cardiovascular Disease** |  |  |  |  |
| **Cardiac Dysrhythmia** | Grade 0-1 | 1498 (98.6) | 1723 (98.6) | 0.9081 |
| Grade 2-4 | 21 (1.4) | 25 (1.4) |
| **Cardiomyopathy** | Grade 0-1 | 1412 (93.0) | 1617 (92.5) | 0.6214 |
| Grade 2-4 | 107 (7.0) | 131 (7.5) |
| **Myocardial Infarction** | Grade 0-2 | 1485 (97.8) | 1669 (95.5) | 0.0004 |
| Grade 3-4 | 34 (2.2) | 79 (4.5) |

P-values reported for Chi-Square statistic, T-test for age at evaluation and age at diagnosis
